# Supplementary material for: Account for Clinical Heterogeneity in Assessment of Catheter-based Renal Denervation among Resistant Hypertension Patients: Subgroup Meta-analysis
Source: PubMed Central journal article supplement — Chin Med J (Engl). 2017 Jul 5;130(13):1586–94. doi: 10.4103/0366-6999.208238 (PMC5494923; doi:10.4103/0366-6999.208238), 2017-07-05
Supplement: CMJ-130-1586_Suppl1.pdf [file CMJ-130-1586_Suppl1.pdf]

## SUPPLEMENTARY INFORMATION

### Supplementary text 1: Search strategy

Database: EBM Reviews - Cochrane Central Register of Controlled Trials <June 2016>, Embase <1974 to 2016 June>, Ovid MEDLINE (R) 1946 to Present with Daily Update

Search Strategy:

1. hypertension
2. hypertens\$.tw.
3. exp BP
4. (BP or bloodpressure).mp.
5. or/1-4
6. denervation {Including Related Terms}
7. ((kidney? or renal) adj8 (denervat\$ or sympatlect\$)).mp.
8. (RDN or RSDN).tw.
9. or/6-8
10. randomized controlled trial [pt]
11. controlled clinical trial [pt]
12. randomized [tiab]
13. placebo [tiab]
14. clinical trials as topic [mesh: noexp]
15. randomly [tiab]
16. trial [ti]
17. or/10-16 (165337)
18. animals [mh] not humans [mh]
19. 17 not 18
20. 5 and 9 and 19.

Database: PubMed

1. hypertens\*
2. blood pressure [Mesh]
3. #1 or #2
4. denervation
5. ((kidney\* or renal\*)) AND (denervat\* or sympatlect\*)
6. RDN OR RSDN
7. #4 or #5 or # 6
8. (((((((randomized controlled trial[Publication Type]) OR controlled clinical trial[Publication Type]) OR randomized[Title/Abstract]) OR placebo[Title/Abstract]) OR clinical trials[MeSH Major Topic]) OR randomly[Title/Abstract]) OR trial[Title])) NOT ((animals [mh] not humans [mh]))
9. English or Chinese [Language]
10. #3 and #7 and #8 and #9.
